# Supplementary material
Source: publisher figshare collection journal article supplement (https://karger.figshare.com/ndownloader/files/18035747)
Supplement: Supplementary file 1 [file 18035747]

**Table.**Experimental groups of the study: Name, conditions, treatments, number of animals, and behavioral/molecular tests (time of tests) were illustrated in this table for each experimental groups.

| **Groups** | **Conditions** | **Numb.** | **Treatments** | **Behavioral test (time)** |
| --- | --- | --- | --- | --- |
| **Control** | Without stress | 8 | Saline (PND 31-45) | Splash test (PND45) |
| **Control** | Without stress | 8 | Saline (PND 31-45) | OFT/ FST (PND 45) |
| **Control** | Without stress | 8 | Saline (PND 31-45) | EPM (PND 45) |
| **MS** | MS paradigm (PND2-PND14) | 8 | Saline (PND 32-46) | Splash test (PND46) |
| **MS** | MS paradigm (PND2-PND14) | 8 | Saline (PND 32-46) | OFT/FST (PND 46) |
| **MS** | MS paradigm (PND2-PND14) | 8 | Saline (PND 32-46) | EPM (PND 46) |
| **Control + TRG** | Without stress | 8 | TRG (10 mg/kg) (PND 33-47) | Splash test (PND 47) |
| **Control + TRG** | Without stress | 8 | TRG (10 mg/kg) (PND 33-47) | OFT/FST (PND 47) |
| **Control + TRG** | Without stress | 8 | TRG (10 mg/kg) (PND 33-47) | EPM (PND 47) |
| **Control + TRG** | Without stress | 8 | TRG (50 mg/kg) (PND 33-47) | Splash test (PND 47) |
| **Control + TRG** | Without stress | 8 | TRG (50 mg/kg) (PND 33-47) | OFT/FST (PND 47) |
| **Control + TRG** | Without stress | 8 | TRG (50 mg/kg) (PND 33-47) | EPM (PND 47) |
| **Control + TRG** | Without stress | 8 | TRG (100 mg/kg) (PND 33-47) | Splash test (PND 47) |
| **Control + TRG** | Without stress | 8 | TRG (100 mg/kg) (PND 33-47) | OFT/FST (PND 47) |
| **Control + TRG** | Without stress | 8 | TRG (100 mg/kg) (PND 33-47) | EPM (PND 47) |
| **MS+TRG** | MS paradigm (PND2-PND14) | 8 | TRG(10 mg/kg) (PND 32-46) | Splash test (PND46) |
| **MS+TRG** | MS paradigm (PND2-PND14) | 8 | TRG (10 mg/kg) (PND 32-46) | OFT/FST (PND46) |
| **MS+TRG** | MS paradigm (PND2-PND14) | 8 | TRG (10 mg/kg) (PND 32-46) | EPM (PND46) |
| **MS+TRG** | MS paradigm (PND2-PND14) | 8 | TRG(50 mg/kg) (PND 32-46) | Splash test (PND46) |
| **MS+TRG** | MS paradigm (PND2-PND14) | 8 | TRG 50 mg/kg) (PND 32-46) | OFT/FST (PND46) |
| **MS+TRG** | MS paradigm (PND2-PND14) | 8 | TRG (50 mg/kg) (PND 32-46) | EPM (PND46) |
| **MS+TRG** | MS paradigm (PND2-PND14) | 8 | TRG(100 mg/kg) (PND 30-45) | Splash test (PND45) |
| **MS+TRG** | MS paradigm (PND2-PND14) | 8 | TRG (100 mg/kg) (PND 30-45) | OFT/FST (PND45) |
| **MS+TRG** | MS paradigm (PND2-PND14) | 8 | TRG (100 mg/kg) (PND 30-45) | EPM (PND45) |
| **MS+FLX** | MS paradigm (PND2-PND14) | 8 | FLX(50 mg/kg) (PND 33-47) | Splash test (PND47) |
| **MS+FLX** | MS paradigm (PND2-PND14) | 8 | FLX (50 mg/kg) (PND 33-47) | OFT/FST (PND47) |
| **MS+FLX** | MS paradigm (PND2-PND14) | 8 | FLX (50 mg/kg) (PND 33-47) | EPM (PND47) |
| **MS+Vit E** | MS paradigm (PND2-PND14) | 8 | Vit E (50 mg/kg) (PND 33-47) | Splash test (PND47) |
| **MS+Vit E** | MS paradigm (PND2-PND14) | 8 | Vit E (50 mg/kg) (PND 33-47) | OFT/FST (PND47) |
| **MS+Vit E** | MS paradigm (PND2-PND14) | 8 | Vit E (50 mg/kg) (PND 33-47) | EPM (PND47) |
